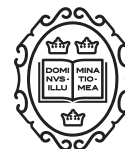

## Interventions

# Non-specific effects of BCG vaccination on morbidity among children in Greenland: a population-based cohort study

S Haahr<sup>1\*</sup>, SW Michelsen<sup>1</sup>, M Andersson<sup>1</sup>, K Bjorn-Mortensen<sup>1</sup>, B Soborg<sup>1</sup>, J Wohlfahrt<sup>1</sup>, M Melbye<sup>1,2,3</sup> and A Koch<sup>1</sup>

<sup>1</sup>Department of Epidemiology Research, Statens Serum Institut, Copenhagen, Denmark, <sup>2</sup>Department of Clinical Medicine, University of Copenhagen, Denmark and <sup>3</sup>Department of Medicine, Stanford School of Medicine, Stanford, CA, USA.

\*Corresponding author. Department of Epidemiology Research, Statens Serum Institut, Artillerivej 5, DK-2300 Copenhagen S, Denmark. E-mail: siha@ssi.dk

Accepted 3 August 2016

## Abstract

**Background:** The potential non-specific effects of BCG (Bacillus Calmette-Guérin) vaccination, with reported reduction of infectious disease morbidity among vaccinated children, in addition to the protective effect against tuberculosis (TB), are highly debated. In Greenland, BCG vaccination was introduced in 1955, but temporarily discontinued from 1991 to 1996 due to nationwide policy changes. Using the transient vaccination stop, we aimed to investigate possible non-specific effects of BCG vaccination by measuring nation-wide hospitalization rates due to infectious diseases other than TB among vaccinated and unvaccinated children.

**Methods:** A retrospective cohort study including all children born in Greenland aged 3 months to 3 years from 1989 to 2004. A personal identification number assigned at birth allowed for follow-up through national registers. Information on hospitalization due to infectious diseases was obtained from the Greenlandic inpatient register using ICD-8 and ICD-10 codes. Participants with notified TB were censored. Incidence rate ratios (IRR) were estimated using Poisson regression.

**Results:** Overall, 19 363 children, hereof 66% BCG-vaccinated, were followed for 44 065 person-years and had 2069 hospitalizations due to infectious diseases. IRRs of hospitalization in BCG-vaccinated as compared with BCG-unvaccinated children were 1.07 [95% confidence interval (CI) 0.96–1.20] for infectious diseases overall, and specifically 1.10 (95% CI 0.98–1.24) for respiratory tract infections. Among BCG-vaccinated children aged 3 to 11 months, the IRR of hospitalization due to infectious diseases was 1.00 (95% CI 0.84–1.19) as compared with BCG-unvaccinated children.

**Conclusion:** Our results do not support the hypothesis that neonatal BCG vaccination reduces morbidity in children caused by infectious diseases other than TB.

**Key words:** BCG, non-specific effects, prevention of infection

### Key Messages

- Potential beneficial non-specific effects of vaccination with BCG on mortality and morbidity are highly debated and diverging results are reported among different child populations in different geographical regions.
- Our results do not support the hypothesis that neonatal BCG vaccination reduces morbidity from infectious diseases other than TB in children aged 3 months to 3 years.
- In Greenland, nationwide policy changes with a temporary complete stop and subsequent re-introduction of BCG vaccination, in combination with: a high burden of infectious diseases; a documented effect of BCG on TB incidence; and an Arctic environment free of non-tuberculosis mycobacteria believed to influence the effect of BCG vaccination; provides us with an ideal setting in which to study the non-specific effects of BCG vaccination.

## Background

Since the 1950s, the BCG (*Bacillus Calmette-Guérin*) vaccine has been used to prevent tuberculosis (TB). The vaccine has a well-documented protective effect against disseminated TB and TB meningitis among children and is the most widely administered vaccine, with estimated global vaccine coverage of 85%.<sup>1,2</sup> A number of studies have suggested that BCG vaccination, in addition to its effect on TB, may decrease morbidity from other infectious diseases.<sup>3,4</sup> This effect is referred to as the heterologous or non-specific effect of the vaccine.<sup>5</sup> It is hypothesized that administering the live attenuated BCG vaccine to neonates improves the overall effect of their immune response towards pathogens unrelated to the *Mycobacterium tuberculosis* complex by inducing cross-reactivity of the adaptive immune system and by training the innate immune system through epigenetic reprogramming.<sup>6</sup>

Observational studies from West Africa have reported decreased incidences of acute lower respiratory infections (ALRI) and mortality among BCG-vaccinated children, especially in the early years of life, more than could be expected due to the effect against TB.<sup>4,7,8</sup> Two randomized controlled trials of BCG vaccination among low-birth-weight children report an association between BCG vaccination and reduced mortality, the most recent proposing BCG vaccination as a mediator of comprehensive protection against infections, based on innate cytokine responses.<sup>9,10</sup>

In Greenland, the national childhood vaccination programme has included neonatal BCG vaccination since 1955.<sup>11</sup> However, due to a markedly reduced incidence of TB in the 1980s, the health authorities in Greenland discontinued BCG vaccination from 1991 through 1996.<sup>12,13</sup> This transient discontinuation, in combination with a high burden of infectious diseases in Greenland<sup>14–18</sup> and the fact that the Arctic climate provides an environment free of

the non-tuberculosis mycobacteria (NTM) believed to influence the effect of BCG vaccination,<sup>19</sup> constitutes an ideal setting for a natural experiment in which to investigate specific and non-specific effects of BCG vaccination.

The purpose of this study was to determine possible non-specific effects of BCG vaccination by comparing nationwide hospitalization rates due to infectious diseases, other than TB, among cohorts of BCG-vaccinated and unvaccinated children aged 3 months to 3 years in Greenland.

## Methods

### Setting

Greenland is part of the Kingdom of Denmark and is governed by the Greenland Self-Government. During the study period, the average annual population was 55 902.<sup>20</sup> The majority of the population is Inuit (88%)<sup>21</sup> and 30% of the population live in the capital Nuuk, 56% in coastal towns and 13% in settlements.<sup>22</sup> All Greenlanders have universal and free access to the health care system, consisting of a central hospital in Nuuk, hospitals in 16 towns and nurse stations in settlements. All hospitals also serve the local settlements and provide both primary and secondary health care including hospital admissions.

### National registers

At birth, all Greenlanders receive a personal identification number through the Civil Registration System (CRS), allowing individual follow-up through all national registers. The CRS provides information on sex, age, place of residence, ethnicity and mortality. Participants were considered Inuit if both parents were born in Greenland. Since 1987, all information on hospital admissions has been reported to the Greenlandic Inpatient Register (GLPR) and

**Table 1.** The National Childhood vaccination programme in Greenland up to the age of 3 years during the study period, according to vaccine and period

| Vaccine               | 1987–90<br>(BCG-vaccinated) | 1991–95<br>(BCG-unvaccinated) | 1996<br>(BCG-unvaccinated) | 1997–2001<br>(BCG-vaccinated) | 2001–04<br>(BCG- vaccinated) |
|-----------------------|-----------------------------|-------------------------------|----------------------------|-------------------------------|------------------------------|
| BCG                   | Neonatal                    | –                             | –                          | Neonatal                      | Neonatal                     |
| Pertussis             | 5, 9, 40 weeks              | 5, 9, 40 weeks                | 5, 9, 40 weeks             |                               |                              |
| DT-IPV <sup>a*</sup>  | 5, 6 and 15 months          | 5, 6 and 15 months            | 5, 6 and 15 months         |                               |                              |
| DTP-IPV <sup>b*</sup> |                             |                               |                            | 3, 5 and 12 months            | 3, 5 and 12 months           |
| HiB <sup>c</sup>      | –                           | –                             | 3, 5 and 12 months         | 3, 5 and 12 months            | 3, 5 and 12 months           |
| MMR <sup>d*</sup>     | 15 months                   | 15 months                     | 15 months                  | 15 months                     | 15 months                    |
| OPV <sup>e</sup>      | 2 years                     | 2 years                       | 2 years                    | 2 years                       | –                            |

Cells with (–) indicate that the vaccine is not given, empty cells indicate that the vaccine is given but in another combination of vaccines.

<sup>a</sup>Diphtheria, tetanus, inactivated polio vaccine.

<sup>b</sup>Diphtheria, tetanus, pertussis, inactivated polio vaccine.

<sup>c</sup>*Haemophilus influenzae* type B, was introduced 1996, delivery and coverage was irregular initially.

<sup>d</sup>Measles, mumps, rubella.

<sup>e</sup>Oral polio vaccine, was discontinued 1 July 2001.

\*Compound vaccines.

includes information on, for example, discharge diagnosis and time of admission. The GLPR used the 8th Revision of the International Classification of Diseases (ICD-8) from 1987 and the 10th Revision (ICD-10) from 1994. Through the GLPR, data on hospitalizations were obtained and categorized as: all-cause morbidity (all diagnoses due to disease), infectious diseases and respiratory tract infections. Parasitic infections and post-infectious conditions were not classified as infectious diseases, but were included in all-cause morbidity. All hospitalizations of healthy children were excluded (e.g. codes for healthy live-born children and for healthy accompanying individuals). For specific ICD-8 and ICD-10 codes, see [Supplementary Appendix, Table A1](#), available at *IJE* online.

Since 1955, TB has been mandatorily notifiable in Greenland, and information on TB was obtained through the TB notification system maintained by the National Board of Health.<sup>23</sup> Information on birthweight and place of delivery (hospital, nurse station, home) was obtained from the national birth register to which notification has been mandatory since 1990.

## BCG vaccination

As part of the Greenlandic national childhood vaccination programme, BCG has been administered intradermally (0.05 ml *Mycobacterium bovis* BCG, Danish strain 1331) to neonates since 1955, with a brief discontinuation from 1991 through 1996.<sup>24,25</sup> The childhood vaccination programme is voluntary and free of charge. Coverage rates of neonatal BCG vaccination in the study period has been reported to be > 93%<sup>11</sup> and, specifically for East Greenland, coverage of 99% has been reported.<sup>25</sup> No catch-up vaccination was offered to the unvaccinated children, except in

the West Greenland town of Maniitsoq.<sup>11</sup> In the present study we assumed all children born from 1 January 1991 to 31 December 1996 to be BCG-unvaccinated, an assumption which has been validated elsewhere.<sup>11,25</sup> During the study period, BCG vaccination was postponed for newborns with birthweight below 2000 g.<sup>26</sup>

Throughout the study period, the national childhood vaccination programme also included the following vaccines during the first 3 years after birth: pertussis, diphtheria, tetanus, inactivated polio, measles, mumps, rubella, oral polio (OPV) and *Haemophilus influenzae* type B. For timing of vaccinations and changes of the vaccination programme over time, see [Table 1](#). Mandatory notification of vaccinations was introduced in 2000, reporting high vaccination coverage of > 80% (except for OPV).<sup>27–29</sup>

## Study design

A cohort study was established, based exclusively on information from national registers. The main cohort consisted of all children born in Greenland and living in Greenland at least once between 3 months and 3 years of age during the period from 1 January 1989 to 31 December 2004. Follow-up began at 3 months of age to avoid transient misclassification of BCG vaccination status due to delayed vaccination and to avoid lack of hospitalization registration caused by delayed registration of the infant's CRS number. Children were followed until one of the following: death, age > 3 years, TB or end of follow-up (31 December 2004), whichever came first. Children were excluded from follow-up at time of emigration and re-included if returning to Greenland. Children who emigrated before beginning of follow-up (age 3 months) without returning to Greenland before the age of 3 years never

entered follow-up. Furthermore, children were excluded from follow-up during hospitalization and the first 14 days following discharge after a hospital admission due to an infectious disease. To test whether findings for the main cohort were applicable also to the youngest children, an additional cohort of children aged 3 days to 3 months was established using similar definitions. Our cohort size was determined by the entire population of Greenland in certain birth cohorts.

### Statistical analysis

The association between BCG vaccination and hospitalization was evaluated by incidence rate ratios (IRR) estimated by log-linear Poisson regression. The variance was estimated by a sandwich estimator, as the same child could contribute with several hospitalizations. As BCG vaccination status was defined by birth cohort, an analysis of BCG with adjustment for age and calendar period is an age-period-cohort analysis, i.e. additional assumptions were needed to allow for estimation. These assumptions were: the age effect is the same for all calendar periods and birth cohorts; the period effect can be described by a log-linear effect with an age-specific slope; and the only potential birth cohort effect is the possible BCG vaccination effect. More specifically, the regression included an age effect (3–11 months, 1 year, 2 years), a linear period effect (based on period in 1-year categories) in interaction with age, and a BCG vaccination effect (birth cohorts: 1989–90, 1997–2004). In addition, IRRs for vaccination were adjusted by sex, ethnicity and place of birth (so main effects for these variables were included). Whether age and sex modified the BCG vaccination effect was evaluated by including an interaction term. Similar analyses were performed with mortality as outcome (except in these analyses children were also at risk during hospitalization), and in extended cohorts including children aged 3 days to 5 years [in these analyses age was categorized as (3 days–3 months, 1 year, 2 years, 3 years, 4 years)]. All tests were based on the score test. All analyses were performed in SAS 9.4 using the GENMOD procedure.

### Ethical considerations

The study was purely register-based and did not physically involve any children. The study was conducted in accordance with the Helsinki II declaration and was approved by the Research Ethics Committee for Health Science Research in Greenland (approval No. 2015-04) and the Danish Data Protection Agency. The Agency for Health and Prevention and the Greenlandic National Board of Health, respectively, gave permission to use the GLPR and the TB notification system.

**Table 2.** Demographic characteristics by BCG vaccination in a cohort of 19 363 children aged 3 months to 3 years and born in Greenland

|                       | Unvaccinated |        | Vaccinated |        |
|-----------------------|--------------|--------|------------|--------|
|                       | N            | (%)    | N          | (%)    |
| All                   | 6677         | (34.5) | 12 686     | (65.5) |
| Sex                   |              |        |            |        |
| Boys                  | 3382         | (50.7) | 6432       | (50.7) |
| Girls                 | 3295         | (49.3) | 6254       | (49.3) |
| Ethnicity             |              |        |            |        |
| Inuit                 | 5499         | (82.4) | 10 463     | (82.5) |
| Non-Inuit             | 314          | (4.7)  | 594        | (4.7)  |
| Mixed                 | 864          | (12.9) | 1629       | (12.8) |
| Place of birth        |              |        |            |        |
| The capital, Nuuk     | 1383         | (20.7) | 2583       | (20.4) |
| Town (excluding Nuuk) | 3814         | (57.2) | 7356       | (58.0) |
| Settlement            | 1470         | (22.0) | 2693       | (21.2) |
| Unknown               | 10           |        | 54         |        |
| Birthweight           |              |        |            |        |
| < 2000 g              | 71           | (1.1)  | 112        | (1.3)  |
| ≥2000 g               | 6312         | (98.9) | 8487       | (98.6) |
| Unknown*              | 294          |        | 4087       |        |
| Place of delivery     |              |        |            |        |
| Hospital              | 5180         | (97.5) | 6847       | (98.6) |
| Nurse station         | 79           | (1.5)  | 56         | (0.8)  |
| Home                  | 56           | (1.1)  | 42         | (0.6)  |
| Unknown*              | 1362         |        | 5741       |        |

\*The group of unknown is relatively larger for vaccinated children, as mandatory registration to the national birth register started in 1990.

### Results

Overall, 19 363 children were included in the study and had 4316 hospitalizations during a total of 44 065 person-years (pyrs) of follow-up. Of all hospitalizations, 2069 were due to infectious diseases, and of these 1581 hospitalizations due to respiratory tract infections. Median time of follow-up was 2.75 years [interquartile range (IQR) 2.03–2.75]. During follow-up, 127 children died, 30 emigrated without return and 24 were diagnosed with TB. In Table 2, demographic characteristics for BCG-vaccinated and BCG-unvaccinated children are shown.

Among vaccinated children, the incidence rate (IR) of hospitalizations due to infectious diseases was 47.6 per 1000 pyrs [95% confidence interval (CI) 45.1–50.3] as compared with 45.9 per 1000 pyrs (95% CI 42.8–49.2) among unvaccinated children. Figure 1 shows the observed IR of hospitalizations due to infectious diseases each year during 1989–2004 in three age groups as point estimates, where the highest IRs were observed among the youngest children. Furthermore, Figure 1 shows the estimated trend in IR for each age group according to calendar year, allowing for a different level of IR for BCG-vaccinated and

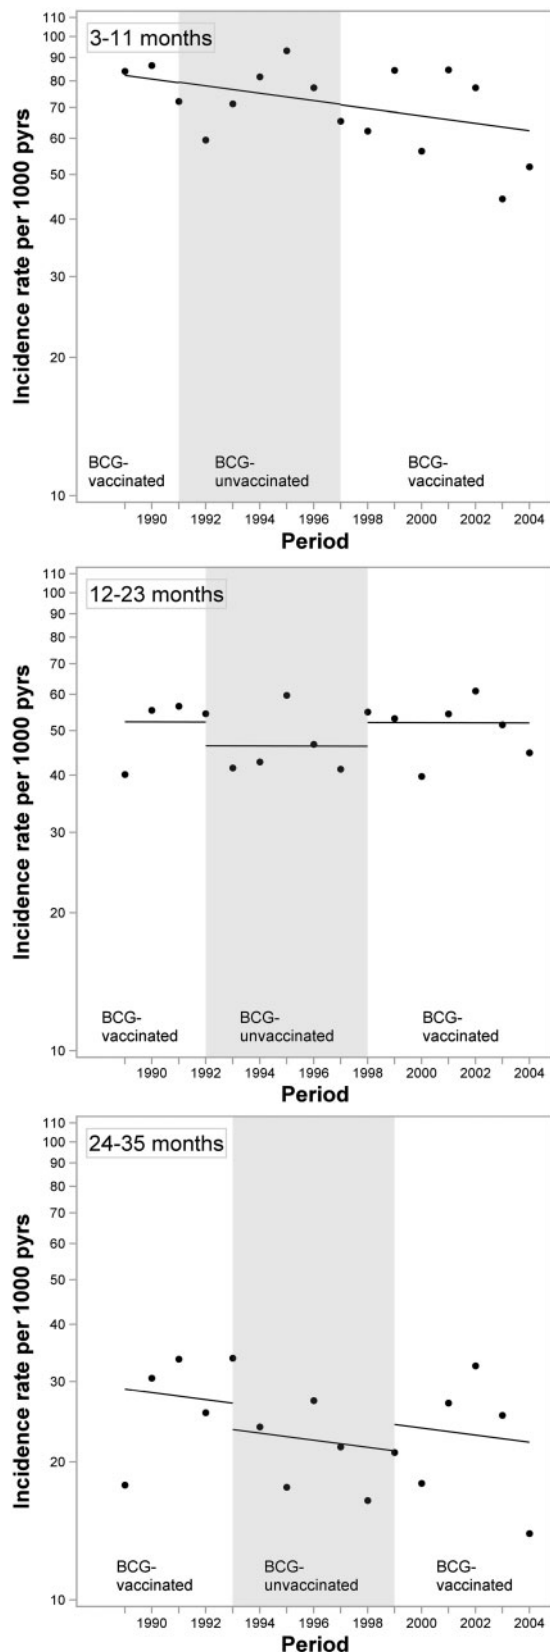

**Figure 1.** Observed incidence rate (IR) of hospitalisation due to infectious disease per 1000 person-years (pyrs) for each year during the study period (1989-2004) in three age groups (point estimates marked by •). The full drawn lines are estimated trends in IR according to

BCG-unvaccinated children. The estimated ratios between the different levels of IR for infectious diseases in vaccinated and unvaccinated children for the three age groups are shown in Table 3 as adjusted IRRs.

There were no differences between vaccinated and unvaccinated children overall or in any of the age groups: age 3–35 months [adjusted IRR 1.07 (95% CI 0.96–1.20)], age 3–11 months [adjusted IRR 1.00 (95% CI 0.84–1.19)], age 12–23 months [adjusted IRR 1.13 (95% CI 0.95–1.34)] and age 24–35 months [adjusted IRR 1.15 (95% CI 0.92–1.43)],  $P_{\text{effect modification by age}} = 0.44$ . The results were similar with adjustment for age in months and with no adjustment (data not shown).

Adjusted IRR estimates for hospitalizations due to infectious diseases among all children did not change when we excluded children with a birthweight below 2000 g [i.e. children who most likely had a delayed BCG vaccination [IRR 1.09 (95% CI 0.98–1.22)], or when only including participants born in East Greenland, where the vaccination assumption was validated and 99% followed the vaccination assumption<sup>25</sup> [IRR 1.12 (95% CI 0.88–1.42)]. Furthermore, no change was observed when censoring children who were offered catch-up vaccination in Maniitsoq in 1997 [IRR 1.09 (95% CI 0.97–1.21)], or when we only included children born in a hospital, i.e. excluding deliveries at home or at nurse stations, possibly leading to delayed BCG vaccination [IRR 1.05 (95% CI 0.85–1.31)]. The same lack of association between BCG vaccination and hospitalization was observed when grouping infectious diseases as respiratory tract infections [IRR 1.10 (95% CI 0.98–1.24)] and non-respiratory tract infections [IRR 0.93 (95% CI 0.74–1.16)] (Table 3). In addition, BCG vaccination was not associated with reduced risk of hospitalization due to non-infectious diseases [IRR = 0.94 (95% CI 0.84–1.05)] (Table 3). Last, there was no difference when comparing IRRs for boys [1.07 (95% CI 0.93–1.23)] with those for girls [1.08 (95% CI 0.93–1.26)],  $P_{\text{effect modification by sex}} = 0.90$ .

In mortality analysis, 127 children died during 44 198 pyrs of follow-up. BCG vaccination was not associated with reduced mortality [adjusted IRR 1.21 (95% CI 0.81–1.81)] (Table 4). In an additional cohort, including children aged 3 days to 3 months, 191 hospitalizations due to infectious diseases were observed during 3922 pyrs of follow-up. In this cohort we likewise found no difference in hospitalization due to infectious diseases among

calendar year allowing for a different level of IR for BCG-vaccinated and BCG-unvaccinated children (–). The white area within the graph is BCG-vaccinated children, the grey area within the graph is BCG-unvaccinated children. Dots representing years with both vaccinated and unvaccinated children are placed at the border between white and grey.



**Table 3.** Events, Incidence Rate (IR) and Incidence Rate Ratio (IRR) of hospitalization by BCG vaccination according to age for different types of hospitalisation in a cohort of 19 363 children aged three months to three years and born in Greenland

| All Hospitalisations |        |        |      |                           |        |                              |                           |                                  |      |                           |        |      |                           |
|----------------------|--------|--------|------|---------------------------|--------|------------------------------|---------------------------|----------------------------------|------|---------------------------|--------|------|---------------------------|
| All-cause morbidity  |        |        |      | Infectious diseases       |        |                              |                           |                                  |      | Non-infectious diseases   |        |      |                           |
|                      |        |        |      | All                       |        | Respiratory tract infections |                           | Non-respiratory tract infections |      |                           |        |      |                           |
| Age                  | Pyrs   | Events | IR * | IRR (95% CI) <sup>†</sup> | Events | IR *                         | IRR (95% CI) <sup>†</sup> | Events                           | IR * | IRR (95% CI) <sup>†</sup> | Events | IR * | IRR (95% CI) <sup>†</sup> |
| All                  |        |        |      |                           |        |                              |                           |                                  |      |                           |        |      |                           |
| Unvaccinated         | 17 493 | 1719   | 98.3 | 1 (ref)                   | 803    | 45.9                         | 1 (ref)                   | 616                              | 35.2 | 1 (ref)                   | 204    | 11.7 | 1 (ref)                   |
| Vaccinated           | 26 572 | 2597   | 97.7 | 1.00 (0.92-1.10)          | 1266   | 47.6                         | 1.07 (0.96-1.20)          | 965                              | 36.3 | 1.10 (0.98-1.24)          | 315    | 11.9 | 0.93 (0.74-1.16)          |
| 3-11 months          |        |        |      |                           |        |                              |                           |                                  |      |                           |        |      |                           |
| Unvaccinated         | 4923   | 740    | 150  | 1 (ref)                   | 370    | 75.2                         | 1 (ref)                   | 295                              | 59.9 | 1 (ref)                   | 85     | 17.3 | 1 (ref)                   |
| Vaccinated           | 7313   | 1037   | 142  | 0.95 (0.82-1.11)          | 518    | 70.8                         | 1.00 (0.84-1.19)          | 400                              | 54.7 | 1.01 (0.85-1.20)          | 121    | 16.5 | 0.88 (0.58-1.32)          |
| 12-23 months         |        |        |      |                           |        |                              |                           |                                  |      |                           |        |      |                           |
| Unvaccinated         | 6352   | 615    | 96.8 | 1 (ref)                   | 294    | 46.3                         | 1 (ref)                   | 220                              | 34.6 | 1 (ref)                   | 75     | 11.8 | 1 (ref)                   |
| Vaccinated           | 9672   | 1003   | 104  | 1.07 (0.93-1.22)          | 504    | 52.1                         | 1.13 (0.95-1.34)          | 386                              | 39.9 | 1.19 (0.97-1.46)          | 121    | 12.5 | 0.91 (0.65-1.27)          |
| 24-35 months         |        |        |      |                           |        |                              |                           |                                  |      |                           |        |      |                           |
| Unvaccinated         | 6218   | 364    | 58.5 | 1 (ref)                   | 139    | 22.4                         | 1 (ref)                   | 101                              | 16.2 | 1 (ref)                   | 44     | 7.1  | 1 (ref)                   |
| Vaccinated           | 9587   | 557    | 58.1 | 1.00 (0.86-1.16)          | 244    | 25.5                         | 1.15 (0.92-1.43)          | 179                              | 18.7 | 1.15 (0.88-1.50)          | 73     | 7.6  | 1.05 (0.70-1.56)          |

\*IRs are per 1000 pyrs.

<sup>†</sup>IRRs are adjusted for age and period (with the assumption described in the method section) and sex, ethnicity and place of birth.

**Table 4.** Events, incidence rate (IR) and incidence rate ratio (IRR) of mortality by BCG vaccination according to age in a cohort of 19 363 children aged three months to three years and born in Greenland

|              |        | Mortality |     |                           |
|--------------|--------|-----------|-----|---------------------------|
| Age          | Pyrs   | Events    | IR* | IRR (95% CI) <sup>†</sup> |
| All          |        |           |     |                           |
| Unvaccinated | 17 544 | 47        | 2.7 | 1 (ref)                   |
| Vaccinated   | 26 654 | 80        | 3.0 | 1.21 (0.80-1.82)          |
| 3-11 months  |        |           |     |                           |
| Unvaccinated | 4946   | 24        | 4.9 | 1 (ref)                   |
| Vaccinated   | 7347   | 52        | 7.1 | 1.61 (0.94-2.75)          |
| 12-23 months |        |           |     |                           |
| Unvaccinated | 6371   | 17        | 2.7 | 1 (ref)                   |
| Vaccinated   | 9704   | 12        | 1.2 | 0.49 (0.24-1.01)          |
| 24-35 months |        |           |     |                           |
| Unvaccinated | 6227   | 6         | 1.0 | 1 (ref)                   |
| Vaccinated   | 9603   | 16        | 1.7 | 1.75 (0.71-4.34)          |

\*IRs are per 1000 pyrs.

<sup>†</sup>IRRs are adjusted for age and period (with the assumption described in the method section) and sex, ethnicity and place of birth.

vaccinated as compared with unvaccinated children [adjusted IRR 0.72 (95% CI 0.49-1.06)].

To compare our results with other studies, we also estimated the risk of hospitalization due to respiratory tract infections for children aged 3 days to 1 year [IRR 0.96 (95% 0.81-1.12)], children aged 3 days to 3 years [IRR 1.07 (95% 0.95-1.20)] and for children aged 3 days to 5 years [IRR 1.03 (95% 0.93-1.14)]; see [Supplementary Appendix, figure A1](#), available at *IJE* online.

## Discussion

In this population-based cohort study from Greenland, we did not find any protective effects of neonatal BCG vaccination on child morbidity when excluding TB, as measured by hospitalization rates due to infectious diseases among children aged less than 3 years. Specifically, we did not find any reduced risk of hospitalizations due to respiratory tract infections other than TB among BCG-vaccinated children. Additionally, neonatal BCG vaccination was not associated with any reduction in mortality rate among children between 3 months and 3 years of age.

The hypothesis that BCG vaccination may have non-specific effects is not new.<sup>3</sup> One of the first studies to show a protective effect of BCG vaccination on child mortality was a follow-up study among 8752 children in West Africa, carried out 15 years ago.<sup>4</sup> The finding was later confirmed in several observational studies<sup>7,8</sup> and in one randomized controlled trial among low-birthweight

children,<sup>10</sup> although the effects were only confirmed among neonates,<sup>10</sup> on the incidence of ALRI,<sup>8</sup> and were more pronounced among girls as compared with boys.<sup>8</sup> Two recent observational studies, one from Spain and one from 37 low- and middle-income countries, found reductions in respiratory tract infections among BCG-vaccinated children aged 0-14 years of 41% and among children under the age of 5 years of 17-37%.<sup>30,31</sup> Most published studies on the subject report a positive non-specific effect of BCG vaccination on child morbidity and mortality. However, in contrast to this, the World Health Organization (WHO) published a systematic review in 2014 reporting great risk of bias in a number of the published studies, stating uncertainty towards the evidence on the effects of BCG vaccination on all-cause mortality.<sup>3</sup>

It is not clear why non-specific effects are observed in some studies and in some countries and not in others, including our study. Observational studies are prone to bias that may not be accounted for, and this goes for our study as well as for others. There are, however, some differences between conditions in Greenland and those of other countries, which make our results particularly interesting. Greenland, being a developed country, has high rates of a number of childhood infections including respiratory tract infections,<sup>15</sup> otitis media,<sup>16</sup> hepatitis,<sup>17</sup> TB<sup>23</sup> and invasive pneumococcal infections, comparable to developing countries.<sup>18</sup> However, unlike other countries with high TB incidence, the TB epidemic in Greenland is characterized by not being associated with HIV infection<sup>14,32,33</sup> or malnutrition.<sup>1,34</sup> Also, children in Greenland are not undernourished<sup>35</sup> and non-tuberculous mycobacteria (NTM) are rare or non-existing.<sup>36</sup> These factors are all known to influence both the immune system<sup>37</sup> and BCG vaccine effectiveness.<sup>19</sup> Possibly for these and other reasons, we previously demonstrated a clear protective effect of BCG vaccination against TB and *Mycobacterium tuberculosis* infection in Greenland,<sup>25</sup> a finding that has been difficult to clearly demonstrate in other populations including populations in tropical settings.<sup>38</sup> Thus, if BCG vaccination has non-specific protective effects against infections in general, we would a priori expect such effects to be measurable in the Greenlandic population. However, we did not observe such effects, either towards infections in general, or towards respiratory tract infections or towards mortality. Thus, we believe that we observe a more unbiased picture of the effects of BCG vaccination in Greenland as compared with other parts of the world. In addition, BCG vaccination in Greenland was given according to year of birth only, and was not influenced by individual factors. This could lead to bias, and we have previously shown that actual BCG vaccination status

corresponds well with year of birth in Greenland.<sup>25</sup> BCG vaccination is administered within 48 h of birth, except for children of low birthweight (1.3%) or on the rare occasion when a delivery does not take place at a hospital (1.6%); these children do however constitute a minority.

It has been discussed how non-specific effects of different vaccines might modify each other.<sup>6,10,31</sup> Our study evaluates non-specific effects of neonatal BCG vaccination in a real-life setting in a population of children aged 3 months to 3 years also exposed to other vaccines according to the Greenlandic childhood vaccination programme. During the study period, most of these vaccines were given at age 3 months or older. We therefore performed an additional analysis among children aged 3 days to 3 months. In this group, as shown in Results, we observed an IRR of 0.72 (95% CI 0.49–1.06), but the evaluation in this age group was low-powered.

Our study has a number of strengths. It was population based, relying exclusively on register information, minimizing selection bias. Greenland has a very high BCG vaccine coverage, minimizing misclassification of the exposure. The nationwide discontinuation of BCG vaccination offers the best possible randomization of the exposure in a setting where real-time randomization of BCG would be unethical. The GLPR was validated in 2011; this report documented a stable reporting rate, high register completeness and accuracy regarding, for example, respiratory diseases, asthma/allergies and viral diseases from 1987 to 2009.<sup>39</sup> It may be argued that we only included morbidity leading to hospitalizations and not morbidity leading to outpatient treatment, which prevents us from estimating the association between BCG vaccination and outpatient morbidity. Trained physicians make diagnoses; however, inpatient diagnoses are determined after longer observation time and/or use of diagnostic tests, as compared with outcomes based on surveys, self-reported symptoms and outpatient diagnoses, which also provides our study with high outcome specificity. We do not consider it likely that possible non-specific effects of BCG vaccination would be observed only for outpatient morbidity and not for inpatient morbidity. We performed a number of sensitivity analyses and found no effect modification by age or sex, and no effect of excluding children at risk of delayed BCG vaccination. Furthermore, our results were not affected by adjustment. Thus, we do not believe that bias or confounding would explain the lack of association between BCG and infectious morbidity found in the present study.

However, since the specific effects of BCG vaccination against *Mtb* infection and TB have been convincingly documented in this TB high-endemic setting, BCG vaccination is still important for public health in Greenland in prevention of *Mtb* infection and TB.

In conclusion, among children in Greenland aged 3 months to 3 years we did not observe any reduced risk of hospitalization due to all-cause morbidity, infectious diseases or mortality among BCG-vaccinated children as compared with BCG-unvaccinated children. Consequently this study does not support the hypothesis that neonatal BCG vaccination carries non-specific effects reducing morbidity in children caused by infectious diseases other than TB.

## Supplementary Data

Supplementary data are available at *IJE* online.

## Funding

This work was supported by: Sundhedspuljen Greenland Self-Government, Dagmar Marshalls Fond, Fonden af 1870. The sponsors played no role in the study design, the collection, analysis or interpretation of data, the writing of the report or the decision to submit the manuscript for publication.

## Author Contributions

All authors made substantial contributions to the acquisition, analysis and interpretation of the data, and drafting, revising and approving the final version of the paper, and all agreed to be accountable for all aspects of the work.

Conflict of interest: None declared.

## References

1. Lahey T, Fordham von Reyn C. *Mycobacterium bovis* BCG and new vaccines against tuberculosis. In: Schlossberg D (ed). *Tuberculosis and Nontuberculous Mycobacterial Infections*. 6th edn. Washington, DC: ASM PRESS, 2011.
2. Harris Jennifer B, Gacic-Dobo. Marta, Eggers Brown, David W Rudolf, SSV. Global Routine Vaccination Coverage, 2013. *MMWR Morb Mortal Wkly Rep* 2014;63:1055–58.
3. Higgins JPT, Soares-Weiser K, Reingold A. Systematic review of the non-specific effects of BCG, DTP and measles containing vaccines. 2014. [http://www.who.int/immunization/sage/meetings/2014/april/3\\_NSE\\_Epidemiology\\_review\\_Report\\_to\\_SAGE\\_14\\_Mar\\_FINAL.pdf?ua=1](http://www.who.int/immunization/sage/meetings/2014/april/3_NSE_Epidemiology_review_Report_to_SAGE_14_Mar_FINAL.pdf?ua=1)
4. Kristensen I, Aaby P, Jensen H. Routine vaccinations and child survival: follow up study in Guinea Bissau, West Africa. *BMJ* 2000;321:1–8.
5. Flanagan KL, van Crevel R, Curtis N, Shann F, Levy O. Heterologous (“nonspecific”) and sex-differential effects of vaccines: epidemiology, clinical trials, and emerging immunologic mechanisms. *Clin Infect Dis* 2013;57:283–89.
6. Benn CS, Netea MG, Selin LK, Aaby P. A small jab – a big effect: nonspecific immunomodulation by vaccines. *Trends Immunol* 2013;34:431–39.
7. Garly ML, Martins CL, Balé C *et al*. BCG scar and positive tuberculin reaction associated with reduced child mortality in



- West Africa: A non-specific beneficial effect of BCG? *Vaccine* 2003;21:2782–90.
8. Stensballe LG, Nante E, Jensen IP *et al.* Acute lower respiratory tract infections and respiratory syncytial virus in infants in Guinea-Bissau: a beneficial effect of BCG vaccination for girls community based case-control study. *Vaccine* 2005;23:1251–57.
  9. Jensen KJ, Larsen N, Biering-Sørensen S *et al.* Heterologous immunological effects of early BCG vaccination in low-birth-weight infants in Guinea-Bissau: a randomized-controlled trial. *J Infect Dis* 2015;211:956–67.
  10. Aaby P, Roth A, Ravn H *et al.* Randomized trial of BCG vaccination at birth to low-birth-weight children: beneficial nonspecific effects in the neonatal period? *J Infect Dis* 2011;204:245–52.
  11. Krause TG, Hviid A, Koch A *et al.* BCG vaccination and risk of atopy. *JAMA* 2003;289:1012–15.
  12. Soborg B, Koch A, Thomsen VØ *et al.* Ongoing tuberculosis transmission to children in Greenland. *Eur Respir J* 2010;36:878–84.
  13. de Colombani P, Thomsen V, Wilche JT. *Tuberculosis Control in Greenland; 2010*. Copenhagen: WHO Regional Office for Europe, Copenhagen, 2011.
  14. Greenland Home Rule Government. *Greenland in Figures 2009*. 2009. [http://www.stat.gl/publ/en/GF/2009/content/Greenland in Figures 2009.pdf](http://www.stat.gl/publ/en/GF/2009/content/Greenland%20in%20Figures%202009.pdf) (1 September 2016, date last accessed).
  15. Koch A, Mølbak K, Homøe P *et al.* Risk factors for acute respiratory tract infections in young Greenlandic children. *Am J Epidemiol* 2003;158:374–84.
  16. Koch A, Homøe P, Pipper C, Hjulær T, Melbye M. Chronic suppurative otitis media in a birth cohort of children in Greenland: population-based study of incidence and risk factors. *Pediatr Infect Dis J* 2011;30:25–29.
  17. Børresen ML, Olsen OR, Ladefoged K *et al.* Hepatitis D outbreak among children in a hepatitis B hyper-endemic settlement in Greenland. *J Viral Hepat* 2010;17:162–70.
  18. Christiansen J, Poulsen P, Ladefoged K. Invasive pneumococcal disease in Greenland. *Scand J Infect Dis* 2004;36:325–29.
  19. Brandt L, Cunha JF, Olsen AW *et al.* Failure of the *Mycobacterium bovis* BCG vaccine: some species of environmental mycobacteria block multiplication of BCG and induction of protective immunity to tuberculosis. *Infect Immun* 2002;70:672–78.
  20. Statistics Greenland. *Statistikbanken*. 2005. [http://bank.stat.gl/pxweb/da/Greenland/Greenland\\_\\_BE\\_\\_BE01/BEXSAT1.px/table/tableViewLayout1/?rxid=BEXST110-03-2016](http://bank.stat.gl/pxweb/da/Greenland/Greenland__BE__BE01/BEXSAT1.px/table/tableViewLayout1/?rxid=BEXST110-03-2016) 11:40:05 (1 September 2016, date last accessed).
  21. Greenland Home Rule Government. *Greenland in Figures 2010*. 2010. [http://www.stat.gl/publ/da/GF/2010/oversigt/GIF\\_2010.pdf](http://www.stat.gl/publ/da/GF/2010/oversigt/GIF_2010.pdf) (1 September 2016, date last accessed).
  22. Greenland Home Rule Government. *Greenland in Figures 2015*. 2015. [http://www.stat.gl/publ/kl/GF/2015/pdf/Greenland in Figures 2015.pdf](http://www.stat.gl/publ/kl/GF/2015/pdf/Greenland%20in%20Figures%202015.pdf) (1 September 2016, date last accessed).
  23. Søborg C, Søborg B, Poulsen S, Pallisgaard G, Thybo S, Bauer J. Doubling of the tuberculosis incidence in Greenland over an 8-year period (1990–1997). *Int J Tuberc Lung Dis* 2001;5:257–65.
  24. National Board of Health in Greenland. *Annual Report from the Chief Medical Officer of Greenland*. 2009. <http://naalakkersuisut.gl/~media/Nanoq/Files/Attached%20Files/Landslaegeembedet/DK/Aarsberetninger/2009/Kapitel%205%20Brnevaccinationer.pdf> (1 September 2016, date last accessed).
  25. Michelsen SW, Soborg B, Koch A *et al.* The effectiveness of BCG vaccination in preventing *Mycobacterium tuberculosis* infection and disease in Greenland. *Thorax* 2014;69:851–56.
  26. Hjulær Inga. *BCG Vaccination of Premature Infants*. Treatment Guideline. Nuuk: Agency for Health and Prevention, 2011.
  27. Hansen CH, Koch A, Wohlfahrt J, Melbye M. A population-based register study of vaccine coverage among children in Greenland. *Vaccine* 2003;21:1704–09.
  28. Skifte TB. Childcare immunization programme – to what extent are children covered by vaccinations in Greenland? *Int J Circumpolar Health* 2004;63(Suppl 2):252–55.
  29. National Board of Health in Greenland. *Annual Report from the Chief Medical Officer of Greenland*. 2004. <http://naalakkersuisut.gl/~media/Nanoq/Files/Attached%20Files/Landslaegeembedet/DK/Aarsberetninger/2004/Kapitel%205%20Brnevaccinationer.pdf> (1 September 2016, date last accessed).
  30. de Castro MJ, Pardo-Seco J, Martín-Torres F. Nonspecific (heterologous) protection of neonatal BCG vaccination against hospitalization due to respiratory infection and sepsis. *Clin Infect Dis* 2015;60:1611–19.
  31. Hollm-delgado M, Stuart EA, Black RE. Acute lower respiratory infection among Bacille Calmette-Guérin (BCG)-vaccinated children. *Pediatrics* 2014;133:e73–81.
  32. Søborg B, Andersen AB, Melbye M *et al.* Risk factors for *Mycobacterium tuberculosis* infection among children in Greenland. *Bull World Health Organ* 2011;89:741–48.
  33. Bjørn-Mortensen K, Ladefoged K, Obel N, Helleberg M. The HIV epidemic in Greenland – A slow spreading infection among adult heterosexual Greenlanders. *Int J Circumpolar Health* 2013;72:1–8.
  34. Nielsen NO, Søborg B, Børresen M, Andersson M, Koch A. Cytokine responses in relation to age, gender, body mass index, *Mycobacterium tuberculosis* infection, and otitis media among Inuit in Greenland. *Am J Hum Biol* 2013;25:20–28.
  35. Niclasen BVL, Bjerregaard P. Child health in Greenland. *Scand J Public Health* 2007;35:313–22.
  36. Edwards L, Comstock G, Palmer C. Contributions of northern populations to the understanding of tuberculin sensitivity. *Arch Environ Health* 1968;17:507–16.
  37. Rosa V De, Matarese G. The immune system and nutrition: Homing in on complex interactions. *Semin Immunol* 2015;27:297–99.
  38. Ponnighaus JM, Msosa E, Gruer PJK *et al.* Efficacy of BCG vaccine against leprosy and tuberculosis in northern Malawi. *Lancet* 1992;339:636–39.
  39. Koch A, Nielsen N, Melbye M. *Validation of the Greenlandic In-patient Register*. Nuuk: Greenland Home Rule Government, 2011.
